**Human AKTIP interacts with ESCRT proteins and functions at the midbody in  
cytokinesis**

**Chiara Merigliano<sup>1,2,\*</sup>, Romina Burla<sup>1,\*</sup>, Mattia La Torre<sup>1</sup>, Simona Del Giudice<sup>1</sup>, Hsiang  
Ling Teo<sup>3</sup>, Chong Wai Liew<sup>3</sup>, Wah Ing Goh<sup>6</sup>, Alexandre Chojnowski<sup>4,5</sup>, Yolanda  
Olmos<sup>7,8,≠</sup>, Irene Chiolo<sup>2</sup>, Jeremy G. Carlton<sup>7,8</sup>, Domenico Raimondo<sup>9</sup>, Fiammetta  
Verni<sup>1</sup>, Colin Stewart<sup>4</sup>, Daniela Rhodes<sup>3</sup>, Graham D. Wright<sup>6</sup>, Brian Burke<sup>5</sup> and  
Isabella Saggio<sup>1,3,#</sup>**

**1 Sapienza University Dept. Biology and Biotechnology, Rome Italy**

**2 University of Southern California, Molecular and Computational Biology  
Department, Los Angeles, CA, 90089, USA**

**3 NTU Institute of Structural Biology, Nanyang Technological University, Singapore**

**4 A\*STAR, Singapore Developmental and Regenerative Biology, Institute of Medical  
Biology, Agency for Science, Technology and Research, Singapore**

**5. A\*STAR, Singapore Nuclear Dynamics and Architecture, Institute of Medical  
Biology, Agency for Science, Technology and Research, Singapore**

**6 A\*STAR, Microscopy Platform, Skin Research Institute of Singapore, Agency for  
Science, Technology and Research, Singapore**

**7 King's College London, Division of Cancer Studies, London UK**

**8 The Francis Crick Institute, London UK**

**9 Sapienza University Dept. Molecular Medicine, Rome Italy**

**≠ Present address: Department of Cell Biology, Universidad Complutense de  
Madrid, Madrid, Spain**

**\* co-first authors**

**# corresponding author**

27 **Abstract**

28

29 To complete mitosis, the intercellular bridge that links daughter cells needs to be cleaved.  
30 This abscission step is carried out by the sequential recruitment of ESCRT proteins at the  
31 midbody. We report here that a new factor, named AKTIP, works in association with  
32 ESCRTs. We find that AKTIP binds to the ESCRT I subunit VPS28, and show by high  
33 resolution microscopy that AKTIP forms a ring in the dark zone of the intercellular bridge.  
34 This ring is positioned in between the circular structures formed by ESCRTs type III.  
35 Functionally, we observe that the reduction of AKTIP impinges on the recruitment of the  
36 ESCRT III member IST1 at the midbody and causes abscission defects. Taken together,  
37 these data indicate that AKTIP is a new factor that contributes to the formation of the  
38 ESCRT complex at the midbody and is implicated in the performance of the ESCRT  
39 machinery during cytokinetic abscission.

40

41

## 42 **Introduction**

43           To complete cytokinesis, cells need to cleave the intercellular bridge, a membrane  
44 structure enriched in microtubules linking the two daughter cells. This cleavage step,  
45 named abscission, is operated by the endosomal sorting complex required for transport  
46 (ESCRT) (1, 2). The core of the ESCRT machinery is divided into four subfamilies, ESCRT  
47 type I, II and III and VPS4. ESCRT subunits are sequentially positioned at the midbody of  
48 the intercellular bridge according to a precise spatiotemporal scheme. The complex of type  
49 I ESCRTs composed of the subunits TSG101, VPS37, VPS28 and MVB12 or UBAP1, is  
50 recruited first. VPS28 bridges the ESCRT I complex to ESCRT type II, that includes  
51 VPS36 and VPS25. In an alternative to this ESCRT I/II pathway, the protein ALIX is first  
52 recruited at the midbody (1, 2). Following ESCRT I/II or ALIX localization, ESCRTs type III,  
53 such as ESCRTs CHMP2A, CHMP4B and IST1, are positioned. Finally VPS4, an ATPase  
54 that controls the supra-molecular reorganization of ESCRT III subunits, works together  
55 with the microtubule severing enzyme spastin to finalize abscission (2).

56           Beyond controlling abscission, the ESCRT machinery operates also in  
57 multivesicular body (MVB) biogenesis and at the nuclear envelope to repair membrane  
58 discontinuities (2). The plasticity of the machinery is guaranteed by the plurality of ESCRT  
59 members and by the factors associated with the ESCRT complex that direct ESCRTs to  
60 different intracellular sites. In cytokinesis, the protein CEP55 is an ESCRT accessory  
61 factor that forms a disk at the center of the so-called dark zone of the midbody acting as a  
62 platform for the recruitment of ESCRTI/II subunits and for the successive organization of  
63 the ESCRT machinery (1-4). A double ring structure formed by septins interacts with  
64 ESCRT I TSG101 and in this way contributes to demarcate the positioning of the ESCRT  
65 complex, therefore working as another ESCRT associated factor (5).

66           Furthermore, the same ESCRT subunit can act in multiple pathways. For example,  
67 the ESCRT III IST1 has been implicated in both abscission and nuclear envelope sealing

68 (6). However, other members of the ESCRT machinery are site-specific. For instance,  
69 CHMP7, an atypical ESCRT III, works only at the nuclear envelope (6).

70 High resolution microscopy has permitted interpretation at the nanometer scale the  
71 spatial and temporal organization of ESCRT supra-molecular complexes formed at the  
72 midbody (7-10). From such studies, it has been concluded that the ESCRT I TSG101  
73 forms circular structures in the central area of the midbody, while ESCRT II VPS36 is first  
74 organized as a single central cortical ring, then extends towards the constriction site with a  
75 secondary cone-shaped element (11). The ESCRT III subunits CHMP2A, CHMP4B and  
76 IST1 are first organized as double rings at the two sides of the ESCRTI/II complex. In  
77 mid/late stage the organization of these ESCRT subunits evolves into spiral structures with  
78 progressively smaller diameters at the constriction site (7, 10). The organization of ESCRT  
79 III into spirals then leads to the scission of the intercellular bridge by spastin and requires  
80 the activity of VPS4 (7, 10).

81 In our previous work, we characterized a telomeric phenotype associated with a  
82 protein named AKTIP in humans (Ft1 in mouse) (12-14). A reduction in AKTIP expression  
83 resulted in multiple telomeric signals coupled with the activation of DNA damage markers  
84 and with the disorganization of chromatin. In mice, Ft1 reduction causes premature aging  
85 defects that are partially rescued by reducing the expression of the DNA damage sensor  
86 p53 (15, 16). AKTIP is distributed in the nucleus in a punctate pattern and decorates the  
87 nuclear rim in interphase (12, 17). In mitosis, we observed a large AKTIP signal at the  
88 midbody (12, 17).

89 The mechanism by which AKTIP exerts its function is yet to be fully dissected.  
90 AKTIP belongs to a subfamily of ubiquitin-conjugating E2 enzyme variants which includes  
91 the ESCRT I TSG101 (18). Building on this link with ESCRT I TSG101 and on the fact that  
92 AKTIP was detected in at least two ESCRT functional sites (i.e. the nuclear envelope and  
93 the midbody), we decided to investigate the function of AKTIP at the midbody from an

94 ESCRT perspective. We performed structured illumination microscopy (SIM) to allow  
95 nanometer scale resolution of the localization of AKTIP as was previously done to interpret  
96 ESCRT organization and function (7). Here we report that AKTIP forms a ring in the  
97 central dark zone of the intercellular bridge in spatial proximity with ESCRT III subunits,  
98 and also show that AKTIP binds to the ESCRT I VPS28. We find that AKTIP reduction  
99 impinges on ESCRT III IST1 recruitment at the midbody and causes abscission defects,  
100 including longer abscission times and binucleation. Taken together, these data provide  
101 evidence that AKTIP is a new protein associated with the ESCRT machinery functioning in  
102 cytokinesis.

103

## 104 **Results**

### 105 **AKTIP forms a ring in the dark zone of the intercellular bridge that links the two** 106 **daughter cells in telophase**

107 To gain insights into the properties of AKTIP we analyzed its spatiotemporal  
108 distribution from interphase to late cytokinesis. We immunostained HeLa cells for DNA  
109 (DAPI),  $\alpha$ -tubulin and endogenous AKTIP. The confocal images show that in interphase,  
110 AKTIP is detectable as discrete and abundant puncta at the nuclear rim and within the  
111 nucleus (Fig. 1A). During mitosis, the AKTIP signal relocates, and is detected along the  
112 microtubules and on the spindle midzone during anaphase. In late telophase, AKTIP  
113 accumulates on the intercellular bridge at the center of the midbody (Fig 1A, right panels).  
114 At this stage, the AKTIP punctate signal is also visible at the reforming nuclear rim and in  
115 the nucleoplasm.

116 To validate the specificity of the localization of AKTIP to the midbody, we compared  
117 the immunostaining using the monoclonal anti-AKTIP antibody (2A11 WH006400M2  
118 Abnova, Fig. 1 and Fig. S1A upper panel) to that obtained with a polyclonal antibody

119 (HPA041794 Sigma; Fig S1A lower panel). We also analyzed the localization of  
120 exogenously expressed AKTIP using anti-FLAG antibody in cells transfected with an  
121 AKTIP-FLAG expressing construct (Fig. S1B). In all cases, we observe a clear AKTIP  
122 signal at the center of the intercellular bridge (Fig. S1A-B). To conclusively prove  
123 specificity, we reduced the expression of the endogenous AKTIP by lentiviral mediated  
124 RNA interference (Fig. S1C-D) and observe a drop in the AKTIP signal at the midbody  
125 (Fig. S1C and quantification in S1E).

126 To visualize the assembly of the AKTIP structure at the midbody, we analyzed its  
127 temporal and spatial distribution by 3D structured illumination microscopy (3D-SIM), which  
128 delivers ~120nm resolution (19). Cells were stained with anti-AKTIP and anti- $\alpha$ -tubulin  
129 antibodies and 3D-SIM images were reconstructed (Fig. 1B and supplementary videos  
130 S1). We subdivided midbody stages into early, mid, late and cut, as previously described  
131 (5, 7). In the early/forming stage, the midbodies have the largest diameter and the tube is  
132 symmetric with respect to the central dark zone. In the mid phase, the microtubules are  
133 packaged into a structure that is still symmetric with respect to the dark zone but has a  
134 smaller diameter. Late stage midbodies are recognizable by their asymmetry and for the  
135 presence of the constriction site. In the early/forming stage, AKTIP is detected as multiple  
136 spots on the microtubules of the midbody (Fig. 1B). Image quantification shows the similar  
137 profiles of tubulin and AKTIP signals (Fig. 1B and C top panels). During the midstage,  
138 AKTIP forms a supra-molecular structure around the central section of the microtubule  
139 tube, while staining on the midbody arms is almost absent (Fig. 1B-C, second panel and  
140 supplementary videos S1). At this stage, the AKTIP signal reaches its maximum intensity  
141 in the dark zone of the midbody where tubulin detection is at its lowest. In late midbodies,  
142 the AKTIP structure loses its regularity and part of the AKTIP signal relocates and is  
143 observed at various distances from the bridge area as demarcated by the  $\alpha$ -tubulin signal  
144 (Fig. 1B, C third panel and supplementary videos S1).

145 In order to assess the size of the AKTIP structure we measured its diameter in mid,  
146 late and cut midbodies (Fig. 2A). The average internal diameter of AKTIP ring is of  
147  $1.05\pm 0.03\mu\text{m}$ , and the external diameter of  $1.89\pm 0.077\mu\text{m}$  (Fig. 2B). When these data are  
148 compared to available measurements for ESCRTs and ESCRT associated factors, we  
149 notice that the AKTIP ring is similar to that formed by ESCRT I TSG101 and by ESCRT II  
150 VPS36, and slightly larger than that calculated for members of the ESCRT III complex  
151 (Fig. 2C).

152 Altogether these results provide evidence that AKTIP forms a supra-molecular ring  
153 structure associated with microtubules. The fully formed supra-molecular structure  
154 localizes in the dark zone in mid-phase midbodies and is progressively disaggregated in  
155 late to cut stage midbodies.

156

### 157 **The rings formed by components of the ESCRT III complex IST1, CHMP4B and** 158 **CHMP2A flank the central ring formed by AKTIP at the midbody**

159 We then asked whether the AKTIP localization was temporally and spatially linked  
160 to subunits of the ESCRT machinery. We focused on the elements of the ESCRT III  
161 complex IST1, CHMP4B and CHMP2A, for which the spatial and temporal localization at  
162 the midbody had been previously defined (7, 10, 20). In early forming midbodies, a low  
163 AKTIP signal follows the tubulin profile (Fig. 3A-B, top panel), and neither AKTIP or IST1  
164 are as yet organized in a supra-molecular structure. In the mid-stage, both AKTIP and  
165 IST1 assemble into ring shaped supra-molecular structures. Two IST1 rings flank the  
166 central, single, larger and thicker AKTIP ring at the midbody (Fig. 3A-B, second panel and  
167 supplementary video S3). In late-to-cut stages, IST1 spirals become apparent on the  
168 asymmetric tubulin bridge, and AKTIP progressively loses its circular organization (Fig.  
169 3A-B, bottom two panels and supplementary video S3). AKTIP is absent from the  
170 secondary ingression, suggesting it is an early component of the abscission machinery.

171 Subsequently, we analyzed the localization of the two other ESCRT III subunits,  
172 CHMP4B (Fig. 3C-D) and CHMP2A (Fig. 3E-F). Co-staining of CHMP2A or CHMP4B and  
173 AKTIP shows that the AKTIP ring is sandwiched in between the two rings composed by  
174 these ESCRT III subunits in mid-stage (Fig. 3C-D, top panels). In late stages, the ESCRT  
175 III subunits CHMP4B and CHMP2A spiral towards the constriction site and AKTIP starts to  
176 lose its structural regularity (Fig. 3C-F).

177 These data show that AKTIP is in the form of a large, circular supra-molecular  
178 structure in proximity with the ESCRT III subunits IST1, CHMP2A and CHMP4B, when  
179 these get organized into double rings in the central portion of mid-stage midbodies.

180

## 181 **Reduction of AKTIP impairs the recruitment of the ESCRT III member IST1 at the** 182 **midbody**

183 Taken together our data indicate that AKTIP forms a circular supra-molecular  
184 structure in the dark zone, at the center of the intercellular bridge that links the two  
185 daughter cells. This AKTIP structure is flanked by ESCRT III subunits in the mid-stage  
186 midbody. To provide an understanding on the role played by this AKTIP structure in the  
187 context of the ESCRT machinery, we investigated whether AKTIP was required for ESCRT  
188 complex assembly. The expression of AKTIP was reduced by RNA interference (Fig. S2)  
189 and the presence of ESCRT III subunits at the midbody monitored, focusing on the  
190 recruitment of CHMP4B, CHMP2A and IST1. We observe that in cells with reduced AKTIP  
191 expression (Fig. S2A), the signal of CHMP4B and CHMP2A at the midbody is only  
192 modestly affected (Fig. 4 A, B and D). In contrast to this, the reduction in AKTIP  
193 expression impinges significantly on the localization signal of IST1 at the midbody (Fig.  
194 4C-D).

195 Together these data indicate that, not only AKTIP has a spatial and temporal  
196 connection with the ESCRT machinery, but it is also functionally implicated in the correct



197 recruitment of components of the ESCRT machinery at the midbody.

198

199 **The reduction of AKTIP expression causes cytokinesis defects including increased**  
200 **abscission time and binucleation**

201 Our results show that the physical proximity of AKTIP with ESCRT III members is  
202 paralleled by a role of AKTIP in controlling the localization of the ESCRT III member IST1.  
203 IST1 plays a central function in abscission by recruiting the microtubule severing enzyme  
204 spastin (21) (22). Spastin is then needed to cut the midbody, coordinating the cytoskeletal  
205 and membrane remodeling events necessary to finalize cytokinesis. Given the role exerted  
206 by AKTIP in controlling the localization of IST1 at the midbody, we asked whether AKTIP  
207 would impact on cytokinesis.

208 First, we explored whether AKTIP reduction affected cell cycle progression by  
209 performing live cell microscopy using HeLa cells stably expressing mCherry tagged  $\alpha$ -  
210 tubulin. This analysis shows that AKTIP reduction, obtained by RNA interference (Fig.  
211 S2B), causes cells to lengthen the abscission stage of cytokinesis from an average time of  
212  $107\pm 5$ min to  $169\pm 12$ min (Fig. 5A-B and Fig. S5 videos). As a consequence of the  
213 reduction in AKTIP we observe that cells remain tethered together through their midbody  
214 for longer times with respect to control cells (Fig. 5C and supplementary videos S5).

215 Analyses on fixed cells confirmed that a reduced AKTIP expression causes  
216 cytokinesis defects. Specifically, when we immunostained control and AKTIP reduced cells  
217 with  $\alpha$ -tubulin, compared with control cells, cells with reduced levels of AKTIP show an  
218 increase in the number of binucleated cells (Fig. 5D-E and Fig. S2C).

219 Altogether these data suggest that AKTIP impacts on the IST1 recruitment at the  
220 midbody and on the formation of the ESCRT complex, and contributes to the completion of  
221 cytokinesis.

222

## 223 **AKTIP interacts with the member of the ESCRT I complex VPS28**

224 Taken together our data demonstrate a physical contiguity of AKTIP with members  
225 of the ESCRT machinery at the midbody, an impact of AKTIP on the assembly of the  
226 ESCRT machinery, and a role for AKTIP in the completion of cytokinesis. To further  
227 understand the possible role of AKTIP as an ESCRT member we searched the 3D  
228 structure protein data bank for AKTIP homologues. This analysis identifies TSG101 as an  
229 AKTIP homologue with high probability (E-value: 6.3E-7). Significantly, TSG101 is part of  
230 the ESCRT I complex, together with VPS37, VPS28 and MVB12 or UBAP1 (1, 2, 23) (24).  
231 TSG101 interacts with the ESCRT I member VPS28, which, in turn, bridges the ESCRT I  
232 complex to the ESCRT II, and therefore to the ESCRT III complexes. Computer-modeling  
233 of AKTIP shows that it superimposes with the UEV domain structure of TSG101 with a root  
234 mean square deviation of 1.9 Å (Fig. 6A). Given the structural homology between AKTIP  
235 and the ESCRT I TSG101, we asked whether AKTIP was biochemically associated with  
236 the ESCRT I complex as is TSG101. To investigate this possibility we carried out a yeast  
237 two hybrid screen. Yeast cells were transformed with a plasmid encoding AKTIP fused to  
238 the Gal4 DNA-binding domain, in combination with ESCRT I, II, III subunits or associated  
239 factors fused to the VP16 activation domain. By measuring LacZ activity in co-  
240 transformants we find that AKTIP significantly and selectively interacts with the ESCRT I  
241 VPS28 (Fig. 6B). To confirm this interaction in mammalian cells, VPS28 was cloned as a  
242 GST-fusion, and AKTIP as HA- or MYC- tagged fusion. 293T cells were co-transfected  
243 with control GST or GST-VPS28 and either MYC-AKTIP or HA-AKTIP. Pull down assays  
244 followed by Western blotting show that AKTIP interacts with VPS28 (Fig. 6C-D). The  
245 interaction is observed with both MYC-tagged AKTIP (Fig. 6C) and with HA-AKTIP (Fig.  
246 6D). GST alone, as expected, does not interact with AKTIP.

247 Taken together, these results indicate that AKTIP interacts with VPS28, which is  
248 bound also by TSG101. We then asked whether AKTIP and TSG101 were both present in  
249 the dark zone or whether the midbody could contain either AKTIP or TSG101. To this end,  
250 we immunostained HeLa cells with both anti-AKTIP and anti-TSG101 antibodies. This  
251 analysis shows that 99% (n=100) of the midbodies are positive for both AKTIP and  
252 TSG101 (Fig. 6E).

253 Altogether these data suggest that AKTIP works in association with the ESCRT I  
254 complex. In addition, the results point to the hypothesis that AKTIP could contribute to the  
255 assembly of the ESCRT machinery at the midbody via its interaction with the ESCRT I  
256 VPS28, which can act as a bridge to the ESCRT II, which in turn would impinge on ESCRT  
257 III assembly and functional abscission (Fig. 6F).

258

259

## 260 **Discussion**

261 AKTIP belongs to a subfamily of ubiquitin-conjugating E2 enzyme variants which  
262 cannot function directly in the ubiquitination pathway since they lack the cysteine residue  
263 required for ubiquitin binding (18). The mechanism of action of members of this family is  
264 not yet understood. In the case of AKTIP, we made two observations that suggest that its  
265 activity could be associated with the ESCRT complex. A first indication comes from the  
266 work by Xu and co-authors, who observed that AKTIP (named FTS) functions in vesicle  
267 trafficking (25), a process in which the ESCRT machinery plays a role. The second  
268 indication comes from a bioinformatics search in the 3D structure data bank, which  
269 indicated that AKTIP has homology with a member of the ESCRT machinery, the ESCRT I  
270 subunit TSG101. Here we report that AKTIP is indeed associated with the ESCRT  
271 machinery and contributes to its function during abscission.

272 The first experimental evidence linking AKTIP to the ESCRT complex is based on  
273 its supra-molecular organization. We show that AKTIP forms a structure around  
274 microtubules at the center of the intercellular bridge where the ESCRT complex is  
275 recruited and acts to finalize abscission (5, 7). The supra-molecular structure of AKTIP has  
276 the shape of a ring, which in mid phase midbody has an average outer diameter of  
277 1.89 $\mu$ m. This circular organization of AKTIP (showed in figures 1 to 3 and in the related  
278 videos) is reminiscent of that of ESCRTs and ESCRT associated factors. These factors  
279 form a series of disks and rings in the dark zone, the central area of the midbody, serving  
280 as a platform for the successive assembly and structural evolution of the ESCRT  
281 machinery. The diameter of the AKTIP ring is similar to that of the ESCRT I member  
282 TSG101, which also forms circular structures at the center of the dark zone.

283 The temporal dynamics of AKTIP at the midbody indicates that the AKTIP supra-  
284 molecular assembly happens in early abscission. The assembly of the AKTIP ring is  
285 preceded by a phase where AKTIP and tubulin have similar localizations. In the mid-stage  
286 of abscission, when the ESCRT III elements have formed full circular structures, the  
287 AKTIP ring is found at the center and in proximity with the ESCRT III subunits IST1,  
288 CHMP2A and CHMP4B. In the late stages of abscission, when the spiral formed by the  
289 ESCRT III factors become evident, AKTIP supra-molecular organization shows a loss of  
290 regularity, suggesting that the AKTIP circular structure is needed in early abscission, prior  
291 to the final constriction and severing stages.

292 A further piece of experimental evidence linking AKTIP to the ESCRT machinery is  
293 the observation that AKTIP interacts with the ESCRT I VPS28 subunit. Since also the  
294 ESCRT I TSG101 also binds to VPS28 (23, 26, 27), we asked whether the presence of  
295 AKTIP and TSG101 at the midbody was mutually exclusive. However, both AKTIP and  
296 TSG101 are detected simultaneously at the center of the intercellular bridge, which  
297 suggests that the regions involved in the interactions between AKTIP and TSG101 with

298 VPS28 are different. This interpretation is consistent with the information obtained by  
299 bioinformatic modeling. In fact, while VPS28 binds to the conserved C-terminal region of  
300 TSG101 (24), AKTIP differs from TSG101 in that region (see figure 6A), and VPS28  
301 binding sites that are used by TSG101 are predicted to be buried in AKTIP by two C-  
302 terminal helices.

303         Since VPS28 bridges the ESCRT I to the ESCRT II complex (27), the interaction of  
304 AKTIP with VPS28 suggests a sequential pathway in which AKTIP via VPS28 is  
305 connected to ESCRT II and further then to ESCRT III (see figure 6F). This in turn points to  
306 a role of AKTIP in the assembly of the ESCRT III complex. The implication of AKTIP in this  
307 process was demonstrated by analyzing the localization of ESCRT III members at the  
308 midbody upon depletion of AKTIP. AKTIP impacts the recruitment of ESCRT III complex  
309 member IST1, but not on that of ESCRT III CHMP2A and CHMP4B. IST1 is an atypical  
310 ESCRT III member that is needed both at the nuclear envelope and in cytokinesis. The  
311 fact that an AKTIP reduction impinges more significantly on the ESCRT III IST1  
312 recruitment at the midbody, as compared to its impact on ESCRT III CHMP4 and  
313 CHMP2B, suggests a further element of distinction of IST1 as compared to the other two  
314 ESCRT III elements.

315         Consistently with the observation that AKTIP impacts on the recruitment of ESCRT  
316 III members at the midbody, the reduction of AKTIP expression affects cell division. Cells  
317 with lowered AKTIP have significantly longer abscission times and are more frequently  
318 binucleated as compared to controls.

319         In summary, we present evidence that the ubiquitin-conjugating E2 enzyme variant  
320 family member AKTIP associates with the ESCRT machinery. AKTIP interacts with the  
321 ESCRT I VPS28 and localizes at the midbody, where it forms a ring in proximity to ESCRT  
322 III subunits. AKTIP affects the recruitment of the pivotal ESCRT factor IST1 and impinges  
323 on cell division (see Fig. 6F). Further work will be required to define the rules for the

324 assembly of AKTIP and other ESCRT factors at the midbody during cell division. It will be  
325 also interesting to investigate whether the AKTIP pool localizing at the nuclear envelope  
326 plays a role in combination with the ESCRT machinery at the nuclear membrane. In fact,  
327 beyond its role in abscission, recent work on IST1 has shown that it is recruited to at the  
328 nuclear envelope to seal the membrane of the daughter nuclei by CHMP7 (6). It will be  
329 interesting to study whether AKTIP subunits localized at the nuclear envelope are  
330 associated with the ESCRT machinery operating at this site and if this activity is related to  
331 IST1. In this respect, it is also tempting to speculate that the phenotype of telomere and  
332 chromatin damage that we observed in AKTIP depleted cells could be due to defects in  
333 the nuclear envelope sealing processes, which would be consistent with the observed  
334 phenotype of DNA damage and cell cycle arrest observed in cells with reduced levels of  
335 CHMP7 (6).

336

337

338

## 339 **Materials and Methods**

### 340 **Cell culture and RNA interference**

341 HeLa (ATCC CCL-2) and HeLa cells expressing mCherry tubulin (28) were grown at  
342 37°C; 5% CO<sub>2</sub> in DMEM (Life Technologies) supplemented with 10% FBS (Life  
343 Technologies) and 50U/ml penicillin and streptomycin (Life Technologies). For transient  
344 RNA interference, cells were cultured in 6-well plates and 20µM siRNA oligonucleotides  
345 (Sigma, SASI\_Hs01\_0086240 for AKTIP, and MISSION® siRNA Universal Negative  
346 Control\_#1\_SIC001 for control, ctr) using Lipofectamine 2000 (Life Technologies) following  
347 manufacturer's protocol. Cells were collected or fixed 72hrs post-transfection. For  
348 lentivirus (LV) mediated interference, viruses were produced as previously described (29).  
349 The LV-shAKTIP (shAKTIP) and LV-scramble (ctr) vectors were described previously (12).  
350 The multiplicity of infection (moi) used was 5pg p24/cell. Transduction was performed in  
351 complete medium supplemented with 8µg/ml polybrene (Sigma). After viral addition, cells  
352 were centrifuged for 30min at 1800rpm at RT, incubated for 3hrs at 37°C and then  
353 transferred to fresh complete medium. Seventy-two hrs post-infection, cells transduced  
354 with LVs were subjected to selection in complete medium supplemented with 2µg/ml  
355 puromycin (Sigma) and kept under these conditions for further analyses.

356

### 357 **Quantification of gene expression**

358 One-week post-transduction, cells were lysed by addition of TRIzol reagent  
359 (Invitrogen) and RNA extracted according to the manufacturer's instructions. After DNase  
360 treatment (Invitrogen), RNA was reverse transcribed into cDNA as already described (30).  
361 q-PCR reactions were carried out as previously described (29), using the following  
362 primers: AKTIP Forward 5'-TCCACGCTTGGTGTTCGAT-3'; AKTIP Reverse 5'-  
363 TCACCTGAGGTGGGATCAACT-3'; GAPDH Forward 5'-



364 TGGGCTACACTGAGCACCAG-3'; GAPDH Reverse 5'-GGGTGTCGCTGTTGAAGTCA-3'  
365 and analyzed with the  $2^{-\Delta\Delta Cq}$  method as previously described (31). For Western blotting,  
366 72hrs post-transfection with siRNAs, protein extracts were obtained as previously  
367 described (12) and quantified by Bradford assay. 100 $\mu$ g protein extracts were loaded onto  
368 pre-cast 4–12% gradient acrylamide gels (Novex, Life Technology). After electro-blotting  
369 filters were incubated with anti-AKTIP (HPA041794 Sigma) and anti-actin-HRP conjugated  
370 (sc-1615, Santa Cruz Biotechnology) antibodies. Filters were then incubated with anti  
371 rabbit HRP-conjugated secondary antibody (sc-2357, Santa Cruz Biotechnology).  
372 Detection was performed using the enhanced chemiluminescence system (Clarity ECL,  
373 Biorad).

374

## 375 **Microscopy**

376 HeLa cells were seeded onto glass coverslips in 6-well plates and fixed with 3.7%  
377 formaldehyde in PBS for 10min. Cells were then permeabilized with 0.25% Triton X-100 in  
378 PBS for 5min and treated with PBS 1% BSA for 30min, then stained with primary  
379 antibodies in PBS 1% BSA for 1hr at RT. In the case of AKTIP-TSG101 co-  
380 immunofluorescence, HeLa cells were seeded on slides, fixed as previously described (5),  
381 permeabilized in PBS- 0.1% Triton X-100 for 2hrs and successively blocked as described  
382 above. The following primary antibodies were used: anti-AKTIP (WH0064400M2 clone  
383 2A11 and HPA041794 Sigma), anti-Tubulin [YL1/2] Rat monoclonal (Abcam, ab6160),  
384 anti-CHMP4B (Proteintech, 13683-1-AP), anti-IST1 (Proteintech, 51002-1-AP), anti-  
385 CHMP2A (Proteintech, 10477-1-AP) and anti-TSG101 (SantaCruz Biotechnology, sc-  
386 7964). Alexa488, Alexa568, Alexa647 or FITC conjugated secondary antibodies were  
387 applied in PBS for 45min at RT. Nuclei were visualized using DAPI (4,6 diamidino-2-  
388 phenylindole) and coverslips were mounted in Vectashield H-1000. Slides were imaged  
389 using Zeiss Axiolmager Z1 equipped with a Axiocam 506 monochrome camera. Confocal



390 laser scanning microscopy was performed with Corrsight confocal scanning microscope.  
391 Greyscale images were pseudocoloured and combined in Adobe Photoshop CC to create  
392 merged images. Live-cell video microscopy was carried out on Corrsight confocal  
393 scanning microscope. siRNA-transfected HeLa cells stably expressing mCherry-tubulin  
394 were cultured in a 37°C microscope chamber with 5% CO<sub>2</sub> and observed by phase  
395 contrast. Images were acquired every 5min. Images were then analyzed with Fiji (National  
396 Institutes of Health, Bethesda, MD).

397 For 3D-SIM imaging, HeLa cells were seeded onto glass coverslips (high performance  
398 coverslips #1.5H, BSF Catalogue #0107052) in 6-well plates and fixed with 3.7%  
399 formaldehyde in PBS for 10min at RT and then incubated in 50mM NH<sub>4</sub>Cl/PBS (15min).  
400 Primary and secondary antibodies were applied in PBS-BSA 1% for 1hr at RT and washed  
401 in PBS. Acquisition was performed using a DeltaVision OMX v4 Blaze microscope (GE  
402 Healthcare, Singapore) with the BGR-FR filter drawer for acquisition of 3D-SIM images.  
403 Olympus Plan Achromat 100×/1.4 PSF oil immersion objective lens was used with  
404 liquid-cooled Photometrics Evolve EM-CCD cameras for each channel. 15 images per  
405 section per channel were acquired with a z-spacing of 0.125µm (32, 33). Structured  
406 illumination reconstruction and wavelength alignment was done using the SoftWorX  
407 software (GE Healthcare). 3D volume reconstructions and movies generation were done in  
408 Imaris (Bitplane). Image analysis and quantification was performed using Image J (34),  
409 Excel (Microsoft) and Prism (Graphpad) software. Fluorescence intensity values represent  
410 the average fluorescence intensity measured from a 2.7µm wide band along the axis of  
411 the tubulin bundle.

412

### 413 **Yeast Two-Hybrid Assays**

414 Yeast two hybrid assays were performed as previously described (28). Briefly, yeast  
415 Y190 cells were co-transformed with plasmids encoding the indicated proteins fused to the

416 VP16 activation domain (pHB18) and AKTIP fused to the Gal4 DNA-binding domain  
417 (pGBKT7). Co-transformants were selected on SD-Leu-Trp agar for 72hrs at 30°C,  
418 harvested, and LacZ activity was measured using a liquid  $\beta$ -galactosidase assay  
419 employing chlorophenolred- $\beta$ -D-galactopyranoside (Roche) as a substrate.

420

## 421 **GST pull down**

422 GST pull down were performed as previously described (35). VPS28 was cloned  
423 as a GST-fusion into pCAGGS/GST. 293T cells were co-transfected with 1 $\mu$ g per well of 6-  
424 well plate of either pCAGGS/GST or pCAGGS/GSTVPS28 and with with 1 $\mu$ g per well of 6-  
425 well plate of pCMV6-Entry-AKTIP-Myc-Flag (ORIGENE) or with 1 $\mu$ g per well of 6-well  
426 plate of AKTIP-HA (pCR3.1) for 48hrs. Cells were then harvested and lysed in NP40 lysis  
427 buffer (150mM NaCl, 50mM Tris pH7.5, 1mM EDTA). Clarified lysates were incubated with  
428 glutathione-Sepharose beads (Amersham Biosciences) for 3hrs at 4°C and washed three  
429 times with wash buffer (50mM Tris-HCl, pH 7.4, 150mM NaCl, 5mM EDTA, 5% glycerol,  
430 0.1% Triton X-100). Bead-bound proteins were eluted by boiling in 100 $\mu$ l of Laemmli  
431 sample buffer, resolved by SDS-PAGE, as previously described (28). Resolved proteins  
432 were transferred onto nitrocellulose by Western blotting and were probed with the  
433 indicated antibodies in 5% milk. HRP-conjugated secondary antibodies were incubated  
434 with ECL Prime enhanced chemiluminescent substrate (GE Healthcare) and visualized by  
435 exposure to autoradiography film. The following primary antibodies were used: anti-HA  
436 (ABIN100176, Antibodies Online), anti-MYC (sc-789, Santa Cruz Biotechnology), anti-GST  
437 (10000-0 AP, Proteintech). The secondary antibodies used were goat anti-rabbit HRP-  
438 conjugated (Cell Signaling).

439

## 440 **Statistics**

441 Statistical analyses were performed using Excel and Graphpad Prism software.  
442 Results are shown as mean  $\pm$  SEM or SD. Data were analyzed using unpaired two-tailed  
443 Student's t-test. p-values below 0.05 were considered significant.

444

## 445 **Acknowledgments**

446 This work has been supported by PRF 2016-67, Progetti di Ricerca, Sapienza University  
447 of Rome (RP1181642E87148C) to IS, FIRC (22392), CIB and Fondazione Buzzati  
448 Traverso to MLT and IS; Avvio alla Ricerca, Sapienza University of Rome  
449 (AR2181642B6F2E48, AR1181642EE61111) to RB, SDG and IS. CM has been supported  
450 by EMBO ST fellowship 7621, Veronesi TG 2019. IC is supported by R01GM117376 and  
451 NSF Career 1751197. JGC is supported by a Wellcome Trust Senior Research Fellowship  
452 206346/Z/17/Z. The A\*STAR Microscopy Platform is supported by the NRF-SIS grant  
453 (NRF2017\_SISFP10), core funding from A\*STAR and an IAF-PP grant (SRIS@Novena).  
454 This work is in the memory of P. Bianco.

455

## 456 **Authors' contributions**

457 CM, RB, MLT, SDG, LTS, LCW, WIG, AC, YO, JGC performed the experiments. IC, JGC,  
458 DR, FV, DR, GDW, CS and BB and evaluated the data. IS designed the experiments and  
459 wrote the paper.

460

## 461 **Declaration of Interests**

462 The authors declare no competing interests.

463

## 464 **References**

- 465 1. Carlton J (2010) The ESCRT machinery: a cellular apparatus for sorting and  
466 scission. *Biochem Soc Trans* 38(6):1397-1412.
- 467 2. Schoneberg J, Lee IH, Iwasa JH, & Hurley JH (2017) Reverse-topology membrane  
468 scission by the ESCRT proteins. *Nat Rev Mol Cell Biol* 18(1):5-17.
- 469 3. Lee HH, Elia N, Ghirlando R, Lippincott-Schwartz J, & Hurley JH (2008) Midbody  
470 targeting of the ESCRT machinery by a noncanonical coiled coil in CEP55. *Science*  
471 322(5901):576-580.
- 472 4. Zhao WM, Seki A, & Fang G (2006) Cep55, a microtubule-bundling protein,  
473 associates with centralspindlin to control the midbody integrity and cell abscission  
474 during cytokinesis. *Mol Biol Cell* 17(9):3881-3896.
- 475 5. Karasmanis EP, *et al.* (2019) A Septin Double Ring Controls the Spatiotemporal  
476 Organization of the ESCRT Machinery in Cytokinetic Abscission. *Curr Biol*  
477 29(13):2174-2182 e2177.
- 478 6. Vietri M, *et al.* (2015) Spastin and ESCRT-III coordinate mitotic spindle disassembly  
479 and nuclear envelope sealing. *Nature* 522(7555):231-235.
- 480 7. Elia N, Sougrat R, Spurlin TA, Hurley JH, & Lippincott-Schwartz J (2011) Dynamics  
481 of endosomal sorting complex required for transport (ESCRT) machinery during  
482 cytokinesis and its role in abscission. *Proc Natl Acad Sci U S A* 108(12):4846-4851.
- 483 8. Gershony O, *et al.* (2017) Measuring abscission spatiotemporal dynamics using  
484 quantitative high-resolution microscopy. *Cytokinesis* 137:205-224.
- 485 9. Sherman S, *et al.* (2016) Resolving new ultrastructural features of cytokinetic  
486 abscission with soft-X-ray cryo-tomography. *Sci Rep* 6:27629.
- 487 10. Goliand I, *et al.* (2018) Resolving ESCRT-III Spirals at the Intercellular Bridge of  
488 Dividing Cells Using 3D STORM. *Cell Rep* 24(7):1756-1764.

- 489 11. Goliand I, Nachmias D, Gershony O, & Elia N (2014) Inhibition of ESCRT-II-CHMP6  
490 interactions impedes cytokinetic abscission and leads to cell death. *Mol Biol Cell*  
491 25(23):3740-3748.
- 492 12. Burla R, *et al.* (2015) AKTIP/Ft1, a New Shelterin-Interacting Factor Required for  
493 Telomere Maintenance. *PLoS Genet* 11(6):e1005167.
- 494 13. Cenci G, *et al.* (2015) The Analysis of Pendolino (peo) Mutants Reveals Differences  
495 in the Fusigenic Potential among Drosophila Telomeres. *PLoS Genet*  
496 11(6):e1005260.
- 497 14. Burla R, La Torre M, & Saggio I (2016) Mammalian telomeres and their partnership  
498 with lamins. *Nucleus* 7(2):187-202.
- 499 15. La Torre M, *et al.* (2018) Mice with reduced expression of the telomere-associated  
500 protein Ft1 develop p53-sensitive progeroid traits. *Aging Cell*:e12730.
- 501 16. Burla R, *et al.* (2018) p53-Sensitive Epileptic Behavior and Inflammation in Ft1  
502 Hypomorphic Mice. *Front Genet* 9:581.
- 503 17. Burla R, *et al.* (2016) The Telomeric Protein AKTIP Interacts with A- and B-type  
504 Lamins and is required to prevent cell senescence *Submitted*.
- 505 18. van Wijk SJ & Timmers HT (2010) The family of ubiquitin-conjugating enzymes  
506 (E2s): deciding between life and death of proteins. *FASEB J* 24(4):981-993.
- 507 19. Schermelleh L, Heintzmann R, & Leonhardt H (2010) A guide to super-resolution  
508 fluorescence microscopy. *J Cell Biol* 190(2):165-175.
- 509 20. Terry SJ, Dona F, Osenberg P, Carlton JG, & Eggert US (2018) Capping protein  
510 regulates actin dynamics during cytokinetic midbody maturation. *Proc Natl Acad Sci*  
511 *U S A* 115(9):2138-2143.
- 512 21. Agromayor M, *et al.* (2009) Essential role of hIST1 in cytokinesis. *Mol Biol Cell*  
513 20(5):1374-1387.

- 514 22. Adell MA & Teis D (2011) Assembly and disassembly of the ESCRT-III membrane  
515 scission complex. *FEBS Lett* 585(20):3191-3196.
- 516 23. Teo H, *et al.* (2006) ESCRT-I core and ESCRT-II GLUE domain structures reveal  
517 role for GLUE in linking to ESCRT-I and membranes. *Cell* 125(1):99-111.
- 518 24. Bishop N & Woodman P (2001) TSG101/mammalian VPS23 and mammalian  
519 VPS28 interact directly and are recruited to VPS4-induced endosomes. *J Biol Chem*  
520 276(15):11735-11742.
- 521 25. Xu L, *et al.* (2008) An FTS/Hook/p107(FHIP) complex interacts with and promotes  
522 endosomal clustering by the homotypic vacuolar protein sorting complex. *Mol Biol*  
523 *Cell* 19(12):5059-5071.
- 524 26. McDonald B & Martin-Serrano J (2008) Regulation of Tsg101 expression by the  
525 steadiness box: a role of Tsg101-associated ligase. *Mol Biol Cell* 19(2):754-763.
- 526 27. Christ L, *et al.* (2016) ALIX and ESCRT-I/II function as parallel ESCRT-III recruiters  
527 in cytokinetic abscission. *J Cell Biol* 212(5):499-513.
- 528 28. Olmos Y, Hodgson L, Mantell J, Verkade P, & Carlton JG (2015) ESCRT-III controls  
529 nuclear envelope reformation. *Nature* 522(7555):236-239.
- 530 29. Piersanti S, *et al.* (2006) Lentiviral transduction of human postnatal skeletal  
531 (stromal, mesenchymal) stem cells: in vivo transplantation and gene silencing.  
532 *Calcif Tissue Int* 78(6):372-384.
- 533 30. Remoli C, *et al.* (2015) Osteoblast-specific expression of the fibrous dysplasia (FD)-  
534 causing mutation Gsalpha(R201C) produces a high bone mass phenotype but does  
535 not reproduce FD in the mouse. *J Bone Miner Res* 30(6):1030-1043.
- 536 31. Piersanti S, *et al.* (2015) Transcriptional Response of Human Neurospheres to  
537 Helper-Dependent CAV-2 Vectors Involves the Modulation of DNA Damage  
538 Response, Microtubule and Centromere Gene Groups. *PLoS One* 10(7):e0133607.

- 539 32. Gustafsson MG, *et al.* (2008) Three-dimensional resolution doubling in wide-field  
540 fluorescence microscopy by structured illumination. *Biophys J* 94(12):4957-4970.
- 541 33. Schermelleh L, *et al.* (2008) Subdiffraction multicolor imaging of the nuclear  
542 periphery with 3D structured illumination microscopy. *Science* 320(5881):1332-  
543 1336.
- 544 34. Schindelin J, *et al.* (2012) Fiji: an open-source platform for biological-image  
545 analysis. *Nat Methods* 9(7):676-682.
- 546 35. Ventimiglia LN, *et al.* (2018) CC2D1B Coordinates ESCRT-III Activity during the  
547 Mitotic Reformation of the Nuclear Envelope. *Dev Cell* 47(5):547-563 e546.
- 548



549 **Figures**

550

551 **Figure 1**

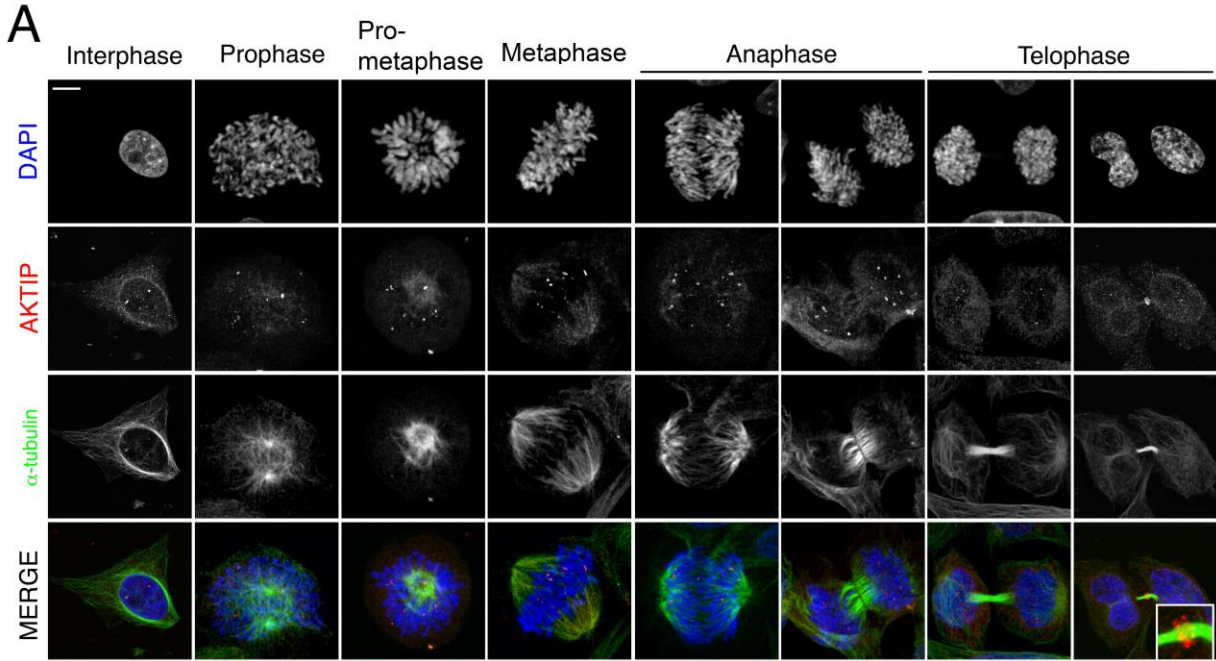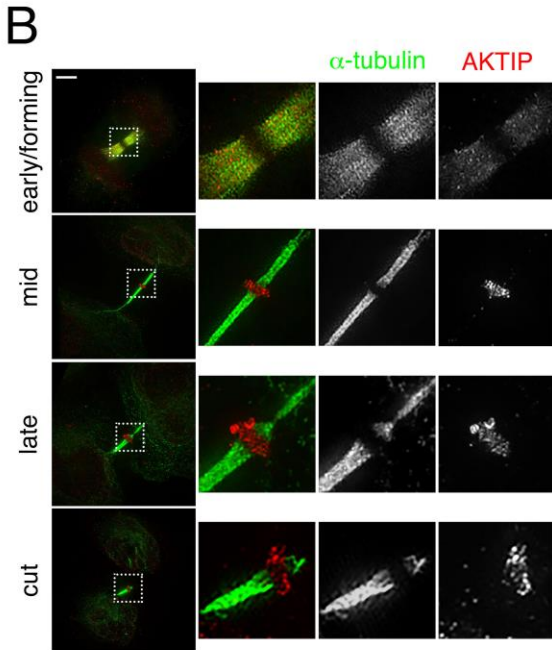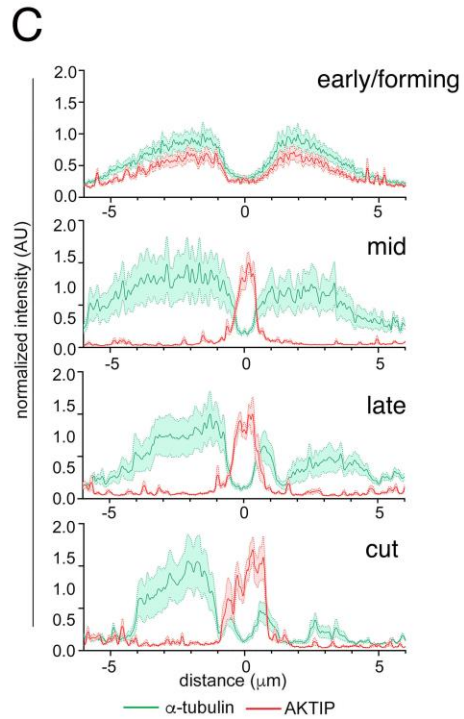

552

553

554

555

556

557

558

559

560

561

562



563 **Figure 2**

**A**

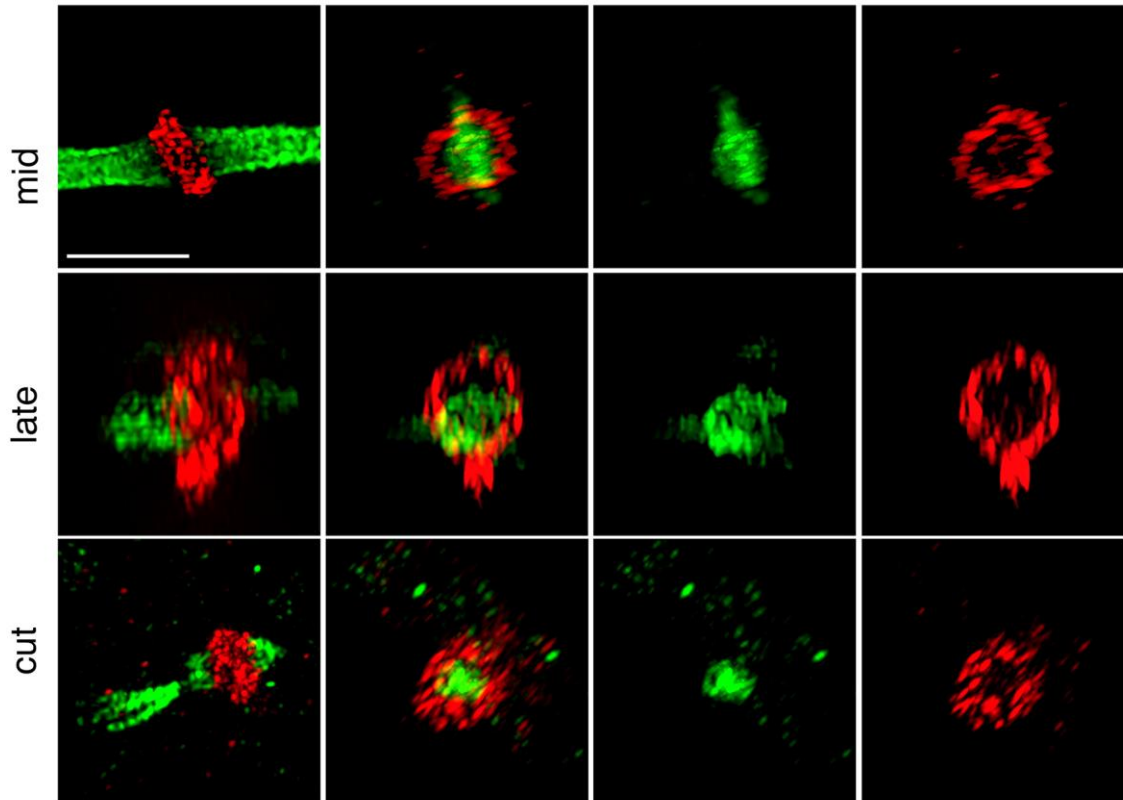

**B**

| Name  | Midbody stage | Internal diameter ( $\mu\text{m}$ ) | External diameter ( $\mu\text{m}$ ) | Microscopy | Visualized protein | n |
|-------|---------------|-------------------------------------|-------------------------------------|------------|--------------------|---|
| AKTIP | mid           | $1.05 \pm 0.03$                     | $1.89 \pm 0.07$                     | 3D-SIM     | endogenous         | 8 |
| AKTIP | late          | $0.98 \pm 0.20$                     | $1.55 \pm 0.20$                     | 3D-SIM     | endogenous         | 7 |
| AKTIP | cut           | $0.97 \pm 0.23$                     | $1.77 \pm 0.21$                     | 3D-SIM     | endogenous         | 7 |

**C**

| Name   | ESCRT type | Midbody stage | External diameter ( $\mu\text{m}$ ) | Microscopy | Visualized protein | Ref  |
|--------|------------|---------------|-------------------------------------|------------|--------------------|------|
| CEP55  |            | early         | $1.4 \pm 0.15$                      | 3D-SIM     | CEP55-GFP          | [7]  |
| TSG101 | I          | early         | $1.7 \pm 0.07$                      | 3D-SIM     | TSG101-GFP         | [7]  |
| VPS36  | II         | early         | $1.7 \pm 0.25$                      | 3D-SIM     | GFP-VPS36          | [11] |
| CHMP4B | III        | early         | $1.25 \pm 0.18$                     | 3D-SIM     | CHMP4B-mCherry     | [7]  |
| IST1   | III        | early         | $1.11 \pm 0.25$                     | STORM      | endogenous         | [10] |
| IST1   | III        | mid           | $1.06 \pm 0.16$                     | STORM      | endogenous         | [10] |
| IST1   | III        | late a        | $1.08 \pm 0.22$                     | STORM      | endogenous         | [10] |
| IST1   | III        | late b        | $0.62 \pm 0.18$                     | STORM      | endogenous         | [10] |
| IST1   | III        | cut a         | $0.96 \pm 0.17$                     | STORM      | endogenous         | [10] |
| IST1   | III        | cut b         | $0.37 \pm 0.08$                     | STORM      | endogenous         | [10] |

564

565 **Figure 3**

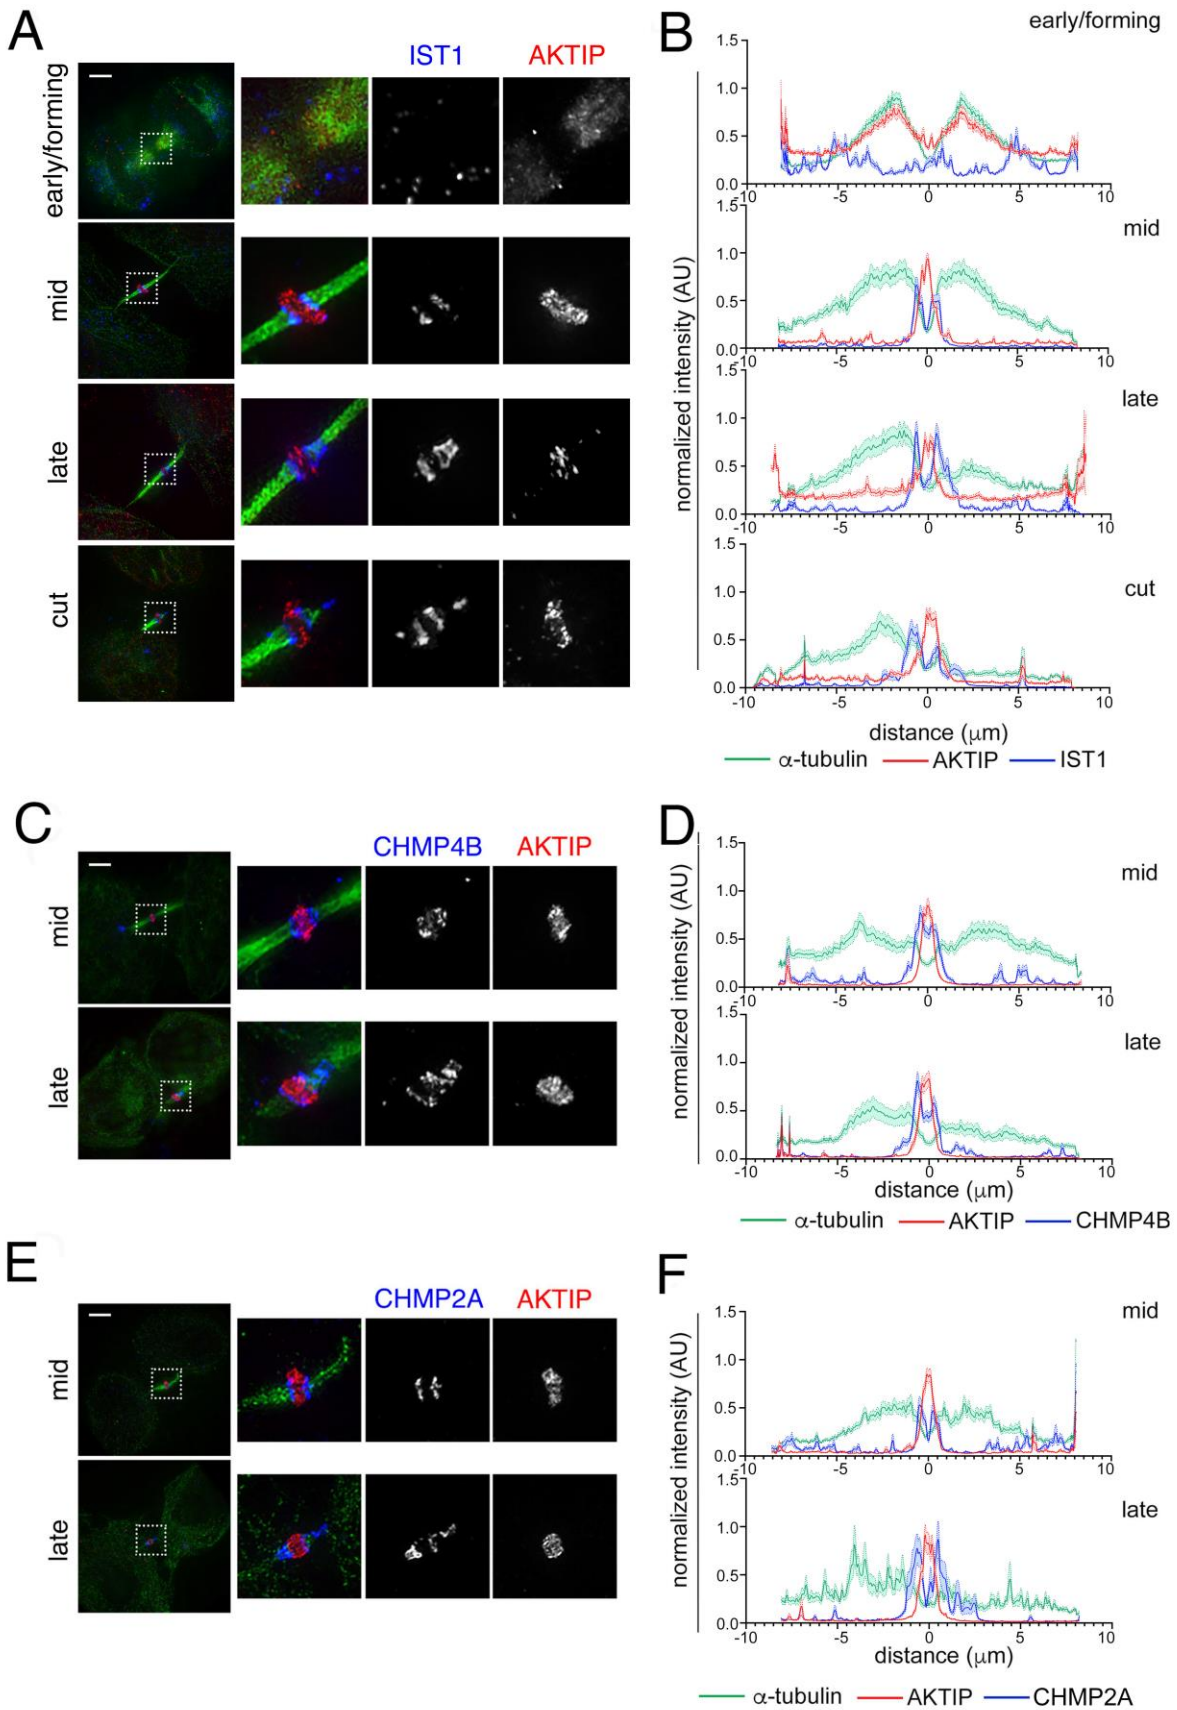

566

567 **Figure 4**

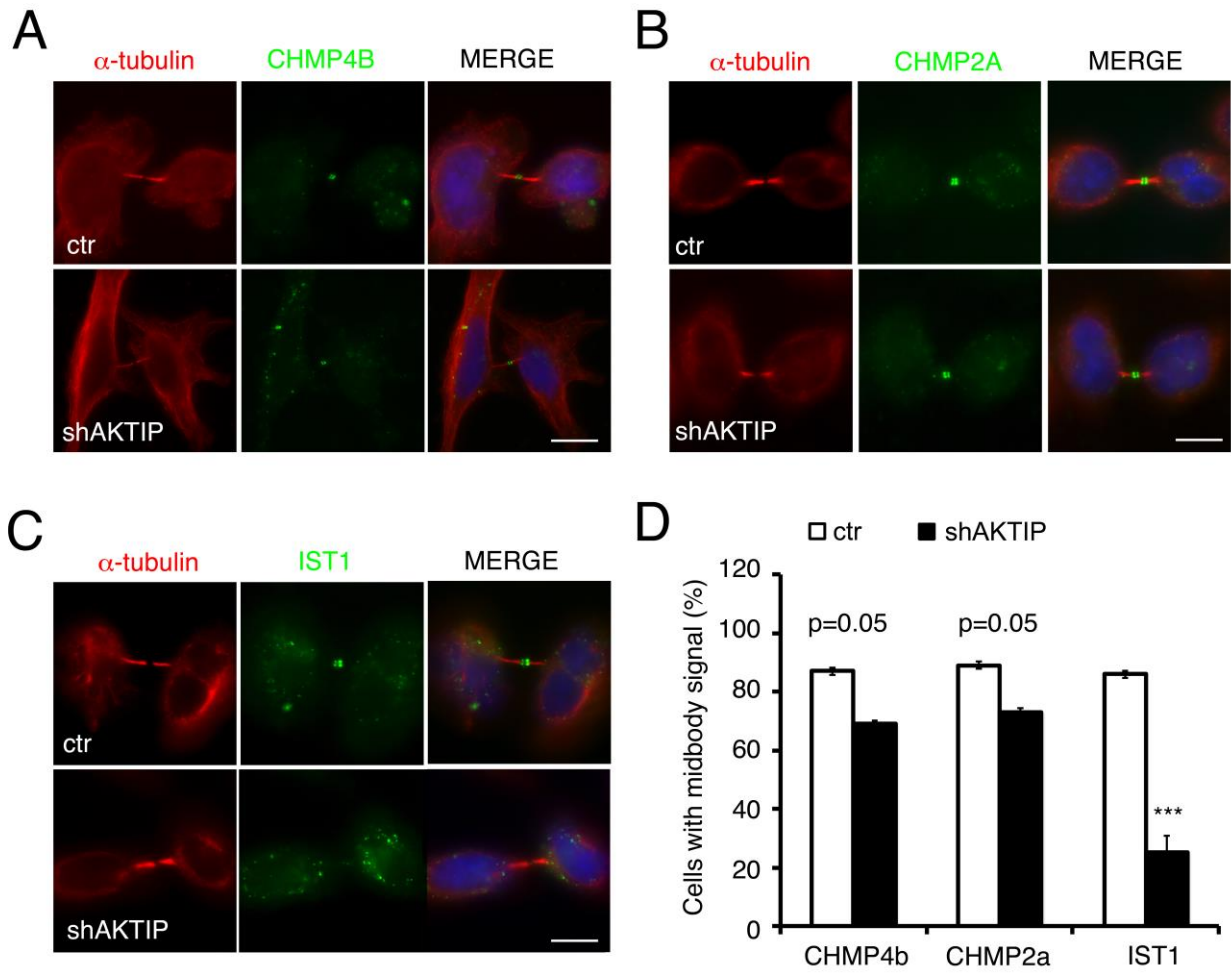

568

569 **Figure 5**

**A**

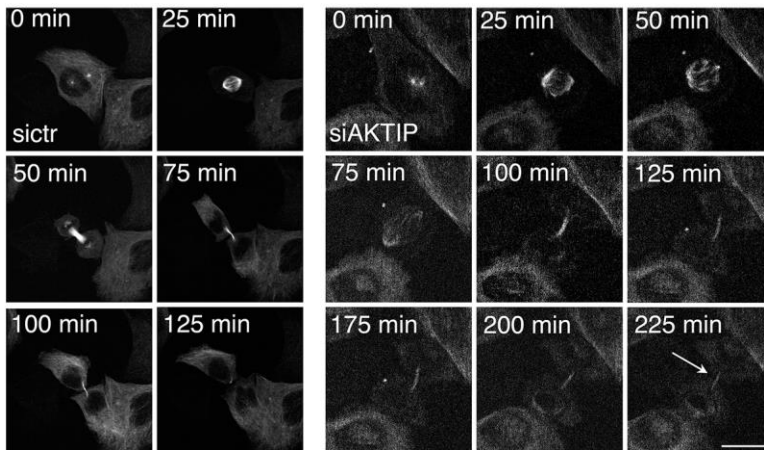

**B**

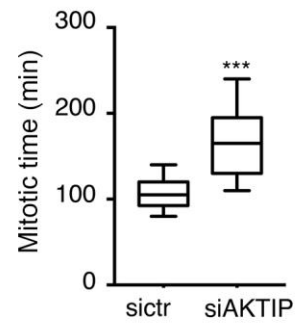

**C**

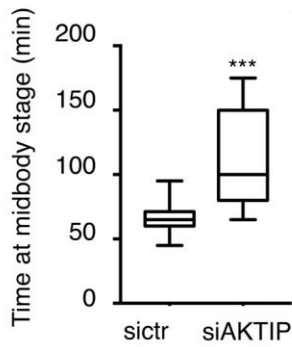

**D**

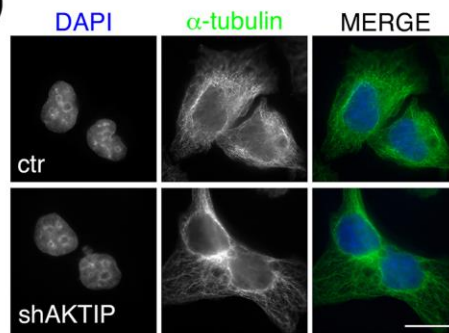

**E**

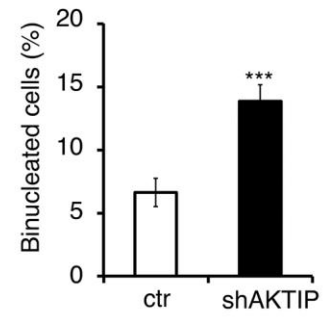

570  
571

572 **Figure 6**

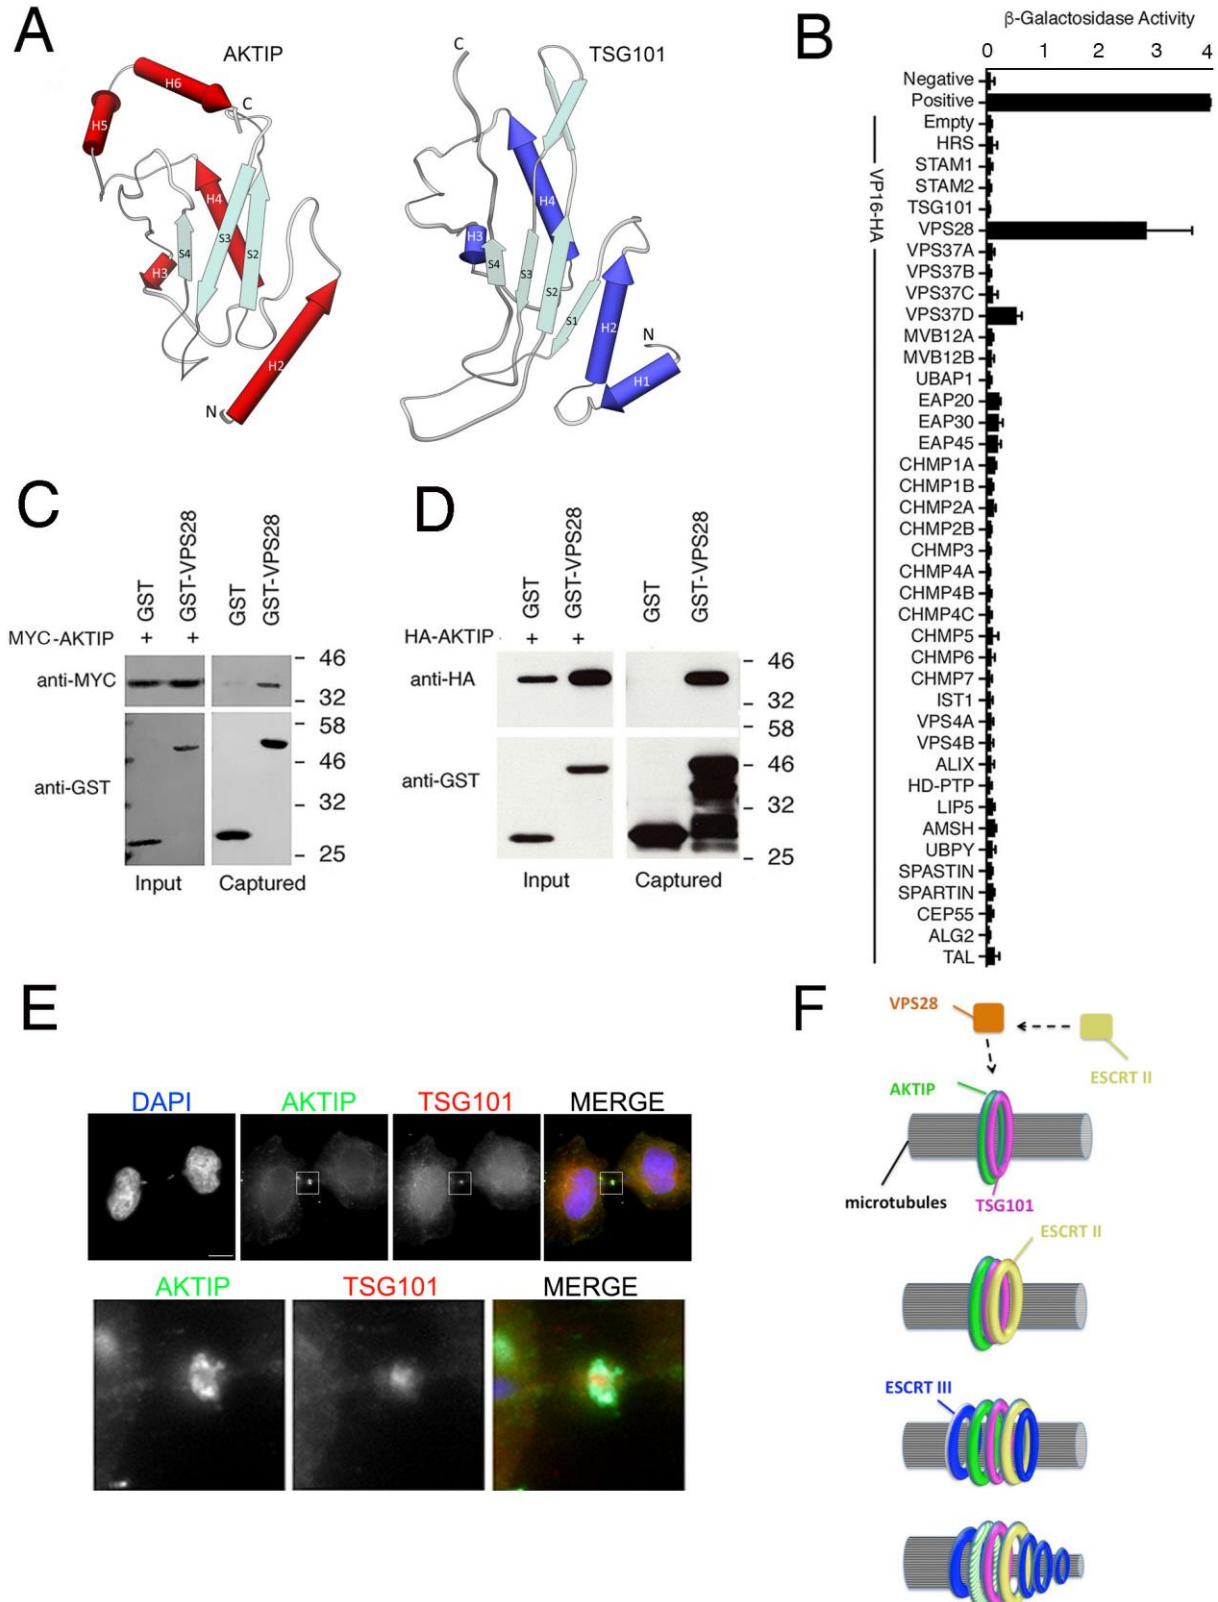

573



574 **Figure Legends**

575 **Figure 1: AKTIP localizes at the dark zone of the midbody (A)** Confocal  
576 immunofluorescence images showing the distribution of endogenous AKTIP in HeLa cells  
577 during mitosis and cytokinesis. HeLa cells were stained with anti-AKTIP (red), anti- $\alpha$ -  
578 tubulin (green) and DAPI to visualize DNA (blue). Scale bar, 5 $\mu$ m. **(B)** Representative 3D-  
579 SIM images of cells with different structural organization observed for AKTIP at the  
580 midbody in early, mid, late and cut stages. HeLa cells were stained with  $\alpha$ -tubulin (green)  
581 and AKTIP (red) antibodies and imaged using 3D-SIM. Panels show the 3D reconstruction  
582 including a zoomed-in. Scale bars, 2 $\mu$ m. **(C)** Quantification of signal distribution in  
583 representative midbody at different stages.

584

585 **Figure 2: The AKTIP supra-molecular structure is circular and has a diameter similar**  
586 **to that of rings formed by ESCRT subunits (A-B)** Representative 3D-SIM images of  
587 AKTIP ring and relative measurements (AKTIP showed in red,  $\alpha$ -tubulin showed in green).  
588 Size of AKTIP structure was measured in mid (n=8), late (n=7) and cut (n=7) midbodies  
589 stages. Scale bar, 3 $\mu$ m. **(C)** Size of the diameters of rings formed by ESCRT subunits and  
590 ESCRT associated factors at the midbody.

591

592 **Figure 3: The AKTIP supra-molecular structure is flanked by ESCRT III rings** 3D-SIM  
593 images of IST1 **(A-B)**, CHMP4B **(C-D)**, CHMP2A **(E-F)** and AKTIP in HeLa cells. Staining  
594 with antibodies against ESCRT III (blue), AKTIP (red) and  $\alpha$ -tubulin (green). Scale bar,  
595 2 $\mu$ m. **(B, D, F)** Quantification of signal distribution in midbodies at different stages. (B)  
596 early/forming, n=6; mid, n=7; late, n=8; cut, n=6; (D) mid, n=6; late, n=4; (F) mid, n=6; late,  
597 n=3.

598

599 **Figure 4: The reduction of AKTIP affects IST1 recruitment to the midbody (A-D)**

600 Localization of CHMP4B (A), CHMP2A (B) and IST1 (C) in control and AKTIP reduced  
601 (shAKTIP) cells (Figure S2) by immunofluorescence staining with antibodies against  
602 CHMP4B/CHMP2A/IST1 (green) and  $\alpha$ -tubulin (red). Scale bar, 5 $\mu$ m. **(D)** Quantification of  
603 cells from (A-C) showing defects in the localization of IST1 marker at the midbody in cells  
604 with reduced AKTIP expression. Results shown are the mean value of three replicates  $\pm$   
605 SEM. \*\*\*p < 0.001; Student's t-test; 100 midbodies per condition were analyzed.

606

607 **Figure 5: The reduction of AKTIP results in cytokinesis defects (A)** Selected frames

608 from time-lapse microscopy of HeLa cells stably expressing mCherry-tubulin transfected  
609 with ctr (left) or AKTIP (right) siRNA. The arrow points to an example of two cells that  
610 remain connected, showing a delay in cytokinesis. Elapsed times are provided in each  
611 panel. Movies showing time-lapse images are provided in supplemental materials. Images  
612 were recorded every 5min, starting 48hrs after siRNA transfection. **(B-C)** Quantitative  
613 analysis of time-lapse microscopy show the time from prometaphase to abscission (B) and  
614 from telophase to abscission (C). Results shown are the mean value of two replicates  $\pm$   
615 SEM. **(D)** Representative images of binucleated cells observed in shAKTIP cells are  
616 shown with DAPI in blue and  $\alpha$ -tubulin in green. **(E)** Quantification of binucleated cells from  
617 (D). Results shown are the mean value of three replicates  $\pm$  SEM. \*\*\*p < 0.001; Student's  
618 t-test. Scale bars, 5 $\mu$ m.

619

620 **Figure 6: AKTIP has structural similarities with the ESCRT I member TSG101 and**

621 **interacts with ESCRT I VPS28 (A)** AKTIP protein 3D model superimposed to TSG101 X-

622 ray solved structure. The model highlights similarities in the central region, and two

623 different elements outside of it: i) the AKTIP central ubiquitin E2 variant (UEV) domain

624 presents two C-terminal helices (H5 and H6), absent in TSG101; ii) TSG101 contains two  
625 N-terminal helices (H1 and H2) while AKTIP only one (H2). **(B)** AKTIP fused to the Gal4  
626 DNA binding domain was tested for interactions with the human components of ESCRT I,  
627 II, III, and ESCRT associated proteins fused to the VP16 activation domain by yeast two-  
628 hybrid assay. Error bars indicate the SEM from the mean of triplicate measurements.  $\beta$ -  
629 Gal,  $\beta$ -galactosidase; O.D., optical density. **(C-D)** Western blotting showing that AKTIP  
630 interacts with GST-VPS28 but not with GST alone. 293T cells were transfected with  
631 plasmids encoding the indicated fusion proteins. Purified VPS28-GST or GST alone were  
632 used to pull-down interacting proteins; cell lysates and glutathione-bound fractions were  
633 then analyzed with MYC or HA antisera as indicated. GST-pull downs were repeated three  
634 times. **(E)** Representative images of HeLa cells stained for AKTIP (green) and TSG101  
635 (red) showing that their presence at the midbody is not mutually exclusive. Lower panels,  
636 enlargement of regions highlighted by the squares in the upper images. **(F)**  
637 Representation of AKTIP implication in the abscission process: AKTIP (green) and  
638 TSG101 (purple) form circular structures around microtubules in early/mid stage  
639 midbodies. Via an interaction with ESCRT I VPS28 (orange), AKTIP can contribute to  
640 recruit ESCRT II (yellow), and ESCRT III (blue). In the final stages of abscission, ESCRT  
641 III members evolve into spirals towards the constriction site, while AKTIP is progressively  
642 disassembled and absent from the secondary ingression site occupied by ESCRT III.  
643



## **Human AKTIP interacts with ESCRT proteins and functions at the midbody in cytokinesis**

**Chiara Merigliano<sup>1,2,\*</sup>, Romina Burla<sup>1,\*</sup>, Mattia La Torre<sup>1</sup>, Simona Del Giudice<sup>1</sup>, Hsiang Ling Teo<sup>3</sup>, Chong Wai Liew<sup>3</sup>, Wah Ing Goh<sup>6</sup>, Alexandre Chojnowski<sup>4,5</sup>, Yolanda Olmos<sup>7,8,≠</sup>, Irene Chiolo<sup>2</sup>, Jeremy G. Carlton<sup>7,8</sup>, Domenico Raimondo<sup>9</sup>, Fiammetta Verni<sup>1</sup>, Colin Stewart<sup>4</sup>, Daniela Rhodes<sup>3</sup>, Graham D. Wright<sup>6</sup>, Brian Burke<sup>5</sup> and Isabella Saggio<sup>1,3,#</sup>**

**1 Sapienza University Dept. Biology and Biotechnology, Rome Italy**

**2 University of Southern California, Molecular and Computational Biology Department, Los Angeles, CA, 90089, USA**

**3 NTU Institute of Structural Biology, Nanyang Technological University, Singapore**

**4 A\*STAR, Singapore Developmental and Regenerative Biology, Institute of Medical Biology, Agency for Science, Technology and Research, Singapore**

**5. A\*STAR, Singapore Nuclear Dynamics and Architecture, Institute of Medical Biology, Agency for Science, Technology and Research, Singapore**

**6 A\*STAR, Microscopy Platform, Skin Research Institute of Singapore, Agency for Science, Technology and Research, Singapore**

**7 King's College London, Division of Cancer Studies, London UK**

**8 The Francis Crick Institute, London UK**

**9 Sapienza University Dept. Molecular Medicine, Rome Italy**

**≠ Present address: Department of Cell Biology, Universidad Complutense de Madrid, Madrid, Spain**

**\* co-first authors**

**# corresponding author**

## Supplementary Information

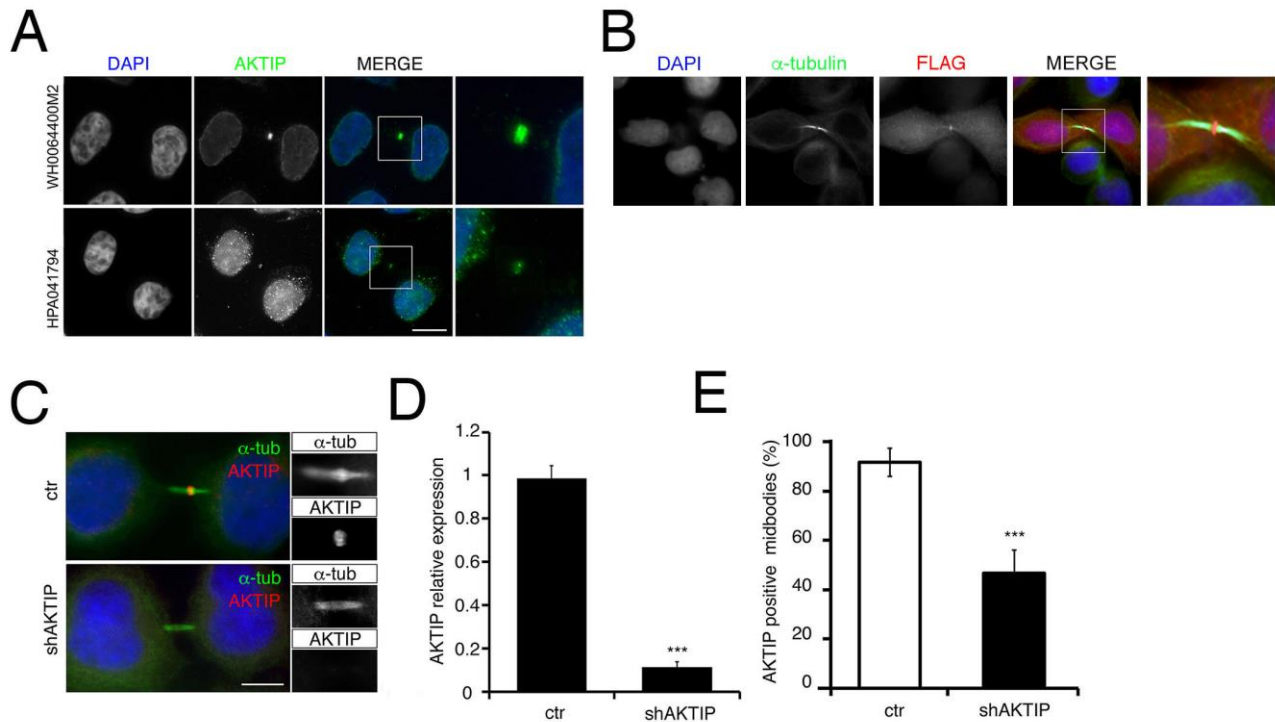

**Figure S1 Specificity of the localization of AKTIP at the midbody (A)** AKTIP localization at the midbody by immunofluorescence in HeLa cells using anti-AKTIP antibodies WH0064400M2 clone 2A11 (top panel) and HPA041794 (lower panel). **(B)** Detection of exogenous AKTIP-FLAG by immunofluorescence using anti-FLAG antibody. **(C-E)** Immunofluorescence with anti-AKTIP (WH0064400M2 clone 2A11) (C) and qPCR (D) showing that AKTIP reduction causes a drop to 47% AKTIP positively staining midbodies as opposed to 91.7% of control cells (E). Results shown are the mean value of two replicates  $\pm$  SEM \*\*\* $p < 0.001$ ; Student's t-test; 60 midbodies per condition were analyzed. Scale bar 5 $\mu$ m.

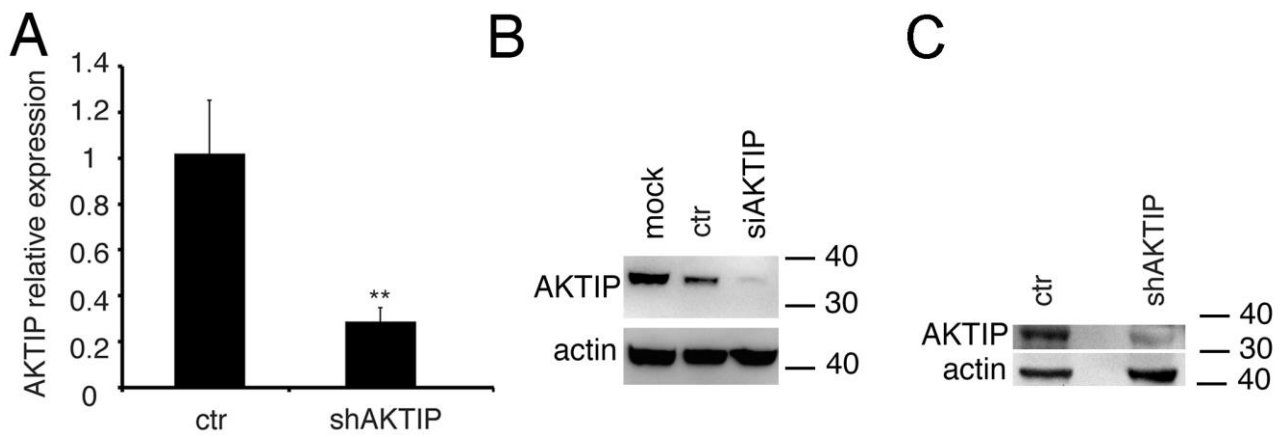

**Figure S2 Reduction of AKTIP expression by RNA interference. (A,C)** qPCR (A) and Western blotting (C) quantification of AKTIP expression in HeLa cells transduced with shRNA directed towards AKTIP with respect to control transduced cells. **(B)** Western blotting showing loss of AKTIP in HeLa cells transfected with siRNAs. Actin was used as loading control.

## Supplementary videos

**S1 videos related to figure 1 (A-B)** 3D volume rendering of mid (A) and late stage (B) midbody imaged with 3D-SIM. HeLa cells were stained with antibodies against  $\alpha$ -tubulin (in green) and AKTIP (in red). The volume rendering and the movie generation were performed with IMARIS software (Bitplane).

**S3 videos related to figure 3 (A-B)** 3D volume rendering of midbody imaged with 3D-SIM. HeLa cells were stained with antibodies against  $\alpha$ -tubulin (green), IST1 (blue) and AKTIP (red). (A) Mid-stage midbody; (B) late stage midbody. The volume rendering and the movie generation were performed with IMARIS software (Bitplane).

**S5 videos related to figure 5 (A-C)** Time-lapse microscopy of HeLa cells stably expressing mCherry-tubulin treated with siAKTIP (A-B) or ctr siRNA (C). The movie generation was performed with Fiji software.
